# Supplementary material for: Methods for Social Media Monitoring Related to Vaccination: Systematic Scoping Review
Source: PubMed Central journal article supplement (PMC7899807; doi:10.2196/17149), 2021-02-08
Supplement: publichealth_v7i2e17149_app2.pdf [file publichealth_v7i2e17149_app2.pdf]

# Social media monitoring around vaccination: a systematic scoping review

## Multimedia Appendices

### Multimedia appendix 2: summary of included articles

| REF  | Platform | Vaccine                  | Country                       | Period monitored            | Search strategy                           | Sentiment analysis                                               |
|------|----------|--------------------------|-------------------------------|-----------------------------|-------------------------------------------|------------------------------------------------------------------|
| [71] | Facebook | Any                      | Global, not specified         | 08/2012 (one point in time) | Manual                                    | Manual (anti, neutral, pro)                                      |
| [72] | Facebook | Any                      | Global, not specified         | One week in 01/2016         | Manual                                    | Manual (anti-vaccination, pro-vaccination, unrelated or unclear) |
| [73] | Facebook | Any                      | Italy                         | 07/2009 – 10/2017           | Automated (Facebook API <sup>a</sup> )    | Automated (anger, anxiety, negative, positive)                   |
| [74] | Facebook | HPV <sup>b</sup>         | United States                 | 06/2016                     | Manual                                    | Manual (negative, neutral, positive)                             |
| [75] | Facebook | Any                      | United States                 | 01/2015 – 08/2016           | Automated (Facebook Python API)           | N/A                                                              |
| [76] | Facebook | Polio                    | Israel                        | 14/08/2013 – 12/11/2013     | Manual                                    | N/A                                                              |
| [77] | Facebook | Polio                    | Israel                        | 28/05/2013 – 31/10/2013     | Manual                                    | N/A                                                              |
| [78] | Facebook | Any                      | Global, not specified         | 01/01/2010 – 31/05/2017     | Automated (Facebook Graph API)            | Manual (anti-vaccine, pro-vaccine)                               |
| [79] | Facebook | Any (childhood vaccines) | Mix: Australia, United States | 14/04/2013 – 14/04/2016     | Automated (Facebook API, Social-MediaLab) | N/A                                                              |
| [80] | Facebook | Any                      | Global, not specified         | 2007-2016                   | Manual                                    | Manual (negative, neutral, positive)                             |
| [81] | Facebook | Any                      | Canada                        | 12/12/2013 – 11/01/2014     | Manual                                    | Manual (ambiguous, hesitant, negative, positive)                 |
| [82] | Forums   | H1N1                     | Spain                         | N/A                         | Manual                                    | Manual (sceptical, pro-vaccination)                              |

|       |                                            |                          |                                            |                         |                                                 |                                                               |
|-------|--------------------------------------------|--------------------------|--------------------------------------------|-------------------------|-------------------------------------------------|---------------------------------------------------------------|
| [84]  | Forums                                     | HPV                      | Romania                                    | 2007-2012               | Manual (Google Search)                          | N/A                                                           |
| [85]  | Forums                                     | Any (childhood vaccines) | Italy                                      | 01/2008 - 06/2014       | Manual (Google Search)                          | N/A                                                           |
| [86]  | Forums                                     | Measles                  | Australia                                  | Three hours             | Manual                                          | Manual                                                        |
| [83]  | Forums (Babytree.com)                      | Rotavirus                | China                                      | 2007-2015               | Manual                                          | N/A                                                           |
| [87]  | Forums (Iltalehti, KaksPlus)               | H1N1                     | Finland                                    | 03/2010 - 05/2010       | Manual                                          | Manual                                                        |
| [88]  | Forums (www.mothering.com and one unnamed) | Any (childhood vaccines) | Mix: Canada, United States                 | 2004-2012               | Manual                                          | N/A                                                           |
| [16]  | Forums (www.mumsnet.com)                   | Measles                  | United Kingdom                             | 31/08/2000 - 05/03/2003 | Manual                                          | Manual (negative, neutral, positive)                          |
| [89]  | Forums (www.mumsnet.com)                   | Any                      | United Kingdom                             | 2011-2017               | Manual                                          | N/A                                                           |
| [95]  | Mix: Digg, Facebook, Twitter, YouTube      | H1N1                     | Canada                                     | 27/10/2009 - 06/04/2010 | Manual (Google Search)                          | N/A                                                           |
| [98]  | Mix: Facebook, Forums, Twitter             | Measles                  | Netherlands                                | 15/04/2013 - 11/11/2013 | Automated (Twiqs.nl, Howards Home)              | Manual (concern, frustration, humour, sarcasm, relief)        |
| [101] | Mix: Facebook, Hyves, LinkedIn, Twitter    | Influenza                | Netherlands                                | 02/2012 - 04/2012       | Automated (Clipit)                              | N/A                                                           |
| [96]  | Mix: Facebook, Twitter                     | Measles                  | United States                              | 2009 - 2016             | Automated (Crimson Hexagon)                     | Automated, Brightview classifier (hesitancy, pro-vaccination) |
| [97]  | Mix: Facebook, Twitter                     | HPV                      | United States                              | 01/06/2014 - 31/05/2015 | Manual                                          | N/A                                                           |
| [100] | Mix: Facebook, Twitter                     | Measles                  | Italy                                      | 01/01/2010 - 31/12/2015 | Manual                                          | Manual (anti-vaccination, neutral, pro-vaccination)           |
| [99]  | Mix: Reddit, Twitter                       | Any                      | Mix: Canada, United Kingdom, United States | 01/02/2015 - 30/09/2016 | Automated (Crimson Hexagon's ForSight platform) | N/A                                                           |

|      |           |                                          |                       |                                                                       |                                                        |                                                                             |
|------|-----------|------------------------------------------|-----------------------|-----------------------------------------------------------------------|--------------------------------------------------------|-----------------------------------------------------------------------------|
| [90] | Pinterest | Any                                      | Global, not specified | 19/03/2014-21/03/2014                                                 | Manual                                                 | Manual (anti-vaccine, neutral, pro-vaccine)                                 |
| [92] | Reddit    | Any                                      | Global, not specified | 01/2007 – 09/2014                                                     | Automated (Reddit API)                                 | Automated, LDA <sup>c</sup> (affirmative, negative)                         |
| [17] | Twitter   | Measles                                  | Global, not specified | 01/01/2016 – 28/11/2016                                               | Automated (Crimson Hexagon)                            | Manual (anti-vaccine, pro-vaccine)                                          |
| [18] | Twitter   | Polio and HPV                            | Global, not specified | 10/2012 – 12/2014                                                     | Automated (Twitter API+ HealthMap data)                | Automated (negative, neutral/unclear, positive)                             |
| [19] | Twitter   | Pentavalent (DTP-HepB-Hib <sup>d</sup> ) | Global, not specified | 07/2006 – 05/2015                                                     | Automated (Twitter API)                                | Manual (negative, neutral/positive )                                        |
| [20] | Twitter   | Any                                      | Global, not specified | 15/04/2014 – 08/11/2014                                               | Automated (Twitter API)                                | N/A                                                                         |
| [21] | Twitter   | Any                                      | Global, not specified | 04/02/2010 – 10/11/2016 (Study A) & 01/01/2014 – 30/04/2015 (Study B) | Automated (Twitter API, Gnip Inc.)                     | Manual (anti-vaccine, neutral, pro-vaccine)                                 |
| [22] | Twitter   | Any                                      | Global, not specified | 14/07/2014 – 26/09/2017                                               | Automated (Twitter API)                                | Manual (anti-vaccine, neutral, pro-vaccine)                                 |
| [23] | Twitter   | HPV                                      | United States         | 07/02/2015 – 13/02/2015                                               | Automated (Twitter API, Python (x,y) and Twython)      | Manual (negative, neutral, positive)                                        |
| [24] | Twitter   | Any                                      | Global, not specified | 11/11/2014 – 08/08/2016                                               | Automated (Twitter API)                                | N/A                                                                         |
| [25] | Twitter   | Any                                      | Italy                 | 01/09/2016 – 31/01/2017                                               | Automated (Twitter API + Java Library: Get Old Tweets) | Automated (in favour of vaccination, neutral, not in favour of vaccination) |
| [26] | Twitter   | Any                                      | United States         | 01/12/2014 – 01/12/2016                                               | Automated (Twitter API)                                | Automated (anti-vaccination)                                                |
| [27] | Twitter   | Measles                                  | Global, not specified | 01/12/2014 – 30/04/2015                                               | Automated (Discover Text.com)                          | Automated (negative, neutral, others, positive)                             |
| [28] | Twitter   | HPV                                      | Global, not specified | 15/07/2015 – 17/08/2015                                               | Automated (Twitter API)                                | Automated (negative, neutral, others, positive)                             |

|      |         |           |                       |                                               |                                                      |                                                                                                              |
|------|---------|-----------|-----------------------|-----------------------------------------------|------------------------------------------------------|--------------------------------------------------------------------------------------------------------------|
| [29] | Twitter | HPV       | Global, not specified | 02/11/2015<br>-<br>28/03/2016                 | Automated (Twitter API)                              | Automated (against, not applicable, pro)                                                                     |
| [30] | Twitter | HPV       | Global, not specified | 01/10/2013<br>-<br>01/04/2014                 | Automated (Twitter API)                              | Automated (negative)                                                                                         |
| [31] | Twitter | HPV       | United States         | 01/10/2013<br>-<br>30/10/2015                 | Automated (Twitter API)                              | N/A                                                                                                          |
| [32] | Twitter | Influenza | Global, not specified | Three influenza vaccination seasons 2013-2016 | Automated (Twitter API)                              | Automated (Does this message indicate that someone received or intended to receive a flu vaccine? (yes, no)) |
| [33] | Twitter | Any       | United States         | 16/04/2015<br>-<br>29/05/2015                 | Automated (Chatter Grabber)                          | Manual (negative, neutral, positive)                                                                         |
| [34] | Twitter | HPV       | Netherlands           | 03/2013 -<br>04/2013                          | Automated (Twitter API)                              | Manual (anti-vaccination, doubt, negative, neutral, no opinion, pro-vaccination, positive)                   |
| [35] | Twitter | HPV       | Global, not specified | Two weeks in 06/2015                          | Automated (Topsy)                                    | Automated (Topsy, sentiment score) and manual (negative, neutral, positive)                                  |
| [36] | Twitter | Influenza | Global, not specified | 23/07/2009<br>-<br>22/10/2016                 | Automated (Twitter API)                              | N/A                                                                                                          |
| [37] | Twitter | Any       | Global, not specified | 08/01/2012<br>-<br>14/01/2012                 | Automated (NodeXL, Social Media Research Foundation) | Manual (negative, neutral, positive)                                                                         |
| [38] | Twitter | HPV       | Global, not specified | 01/08/2011<br>-<br>31/10/2011                 | Automated (Topsy)                                    | Manual (negative, neutral, positive)                                                                         |
| [39] | Twitter | HPV       | Global, not specified | 01/08/2014<br>-<br>31/07/2015                 | Automated (Twitter API)                              | Automated (negative, neutral, positive)                                                                      |
| [40] | Twitter | HPV       | Global, not specified | 01/08/2014<br>-<br>31/07/2015                 | Automated (Black and Colleagues)                     | Automated (negative,                                                                                         |

|      |         |            |                                        |                         |                                                        |                                                           |
|------|---------|------------|----------------------------------------|-------------------------|--------------------------------------------------------|-----------------------------------------------------------|
|      |         |            |                                        |                         | and Microsoft Research)                                | neutral, positive)                                        |
| [41] | Twitter | H1N1       | United Kingdom                         | 01/04/2009 - 01/05/2010 | Automated (Gnip)                                       | N/A                                                       |
| [42] | Twitter | Measles    | Global, not specified                  | 01/01/2012 - 30/06/2015 | Automated (Twitter Firehose)                           | Automated (anti, pro)                                     |
| [43] | Twitter | Any        | Global, not specified                  | 01/04/2014 - 20/06/2014 | Automated (Vaccine Watch)                              | N/A                                                       |
| [44] | Twitter | Diphtheria | Spain                                  | 01/05/2015 - 15/07/2015 | Automated (Topsy)                                      | Manual (negative, neutral, positive)                      |
| [45] | Twitter | Measles    | Global, not specified                  | 01/02/2015 - 09/03/2015 | Automated (Twitter API)                                | N/A                                                       |
| [46] | Twitter | Any        | Global, not specified                  | 11/07/2017 - 17/07/2017 | Automated (NodeXL)                                     | N/A                                                       |
| [47] | Twitter | HPV        | Mix: Australia, Canada, United Kingdom | 01/2014 - 04/2016       | Automated (Twitter API)                                | N/A                                                       |
| [48] | Twitter | Any        | United States                          | 08/12/2014 - 02/03/2015 | Automated (Twitter API)                                | Automated, LDA (negative, neutral, positive)              |
| [49] | Twitter | HPV        | Global, not specified                  | 10/2013 - 10/2015       | Automated (Twitter API)                                | N/A                                                       |
| [50] | Twitter | Measles    | United States                          | 01/12/2014 - 30/04/2015 | Automated (Discover Text.com)                          | N/A                                                       |
| [51] | Twitter | HPV        | Global, not specified                  | 01/2016                 | Manual                                                 | Manual (negative, positive)                               |
| [52] | Twitter | Any        | United States                          | 01/01/2009 - 21/08/2015 | Automated (Social Studio's Radian6 API)                | Automated, Lightside (anti-vaccine, neutral, pro-vaccine) |
| [53] | Twitter | Measles    | United States                          | 01/02/2015 - 09/03/2015 | Automated (Geosocial gauge)                            | Automated (anti-vaccination, neutral, pro-vaccination)    |
| [54] | Twitter | Any        | Italy                                  | 01/09/2016 - 30/11/2016 | Automated (Twitter API + Java Library: Get Old Tweets) | Automated (negative, positive)                            |

|      |                |                          |                       |                         |                                                     |                                                        |
|------|----------------|--------------------------|-----------------------|-------------------------|-----------------------------------------------------|--------------------------------------------------------|
| [55] | Twitter        | Any                      | Global, not specified | 16/05/2015 – 13/09/2015 | Automated (Topsy)                                   | Manual (anti-vaccination, neutral, pro-vaccination)    |
| [56] | Twitter        | H1N1                     | United States         | 08/2009 – 01/2010       | Automated (Twitter API)                             | Automated, NaiveBayes (negative, neutral, positive)    |
| [57] | Twitter        | Measles                  | United States         | 2011-2016               | Automated (Twitter API)                             | Automated (anti-vaccine, other, pro-vaccine)           |
| [58] | Twitter        | HPV                      | Global, not specified | 01/10/2013 – 31/03/2014 | Automated (Twitter API)                             | Automated (anti-vaccine)                               |
| [91] | Weibo          | Hepatitis B              | China                 | 5/12/2013 – 10/01/2014  | Manual                                              | Manual (negative, neutral, positive)                   |
| [93] | Yahoo! Answers | HPV                      | Chile                 | 17/04/2015 – 03/05/2015 | Manual                                              | N/A                                                    |
| [94] | Yahoo! Answers | Influenza                | Japan                 | 01/04/2004 – 07/04/2009 | Automated (Yahoo! Answers API (via Python scripts)) | N/A                                                    |
| [59] | YouTube        | HPV                      | Global, not specified | 08/02/2008              | Manual                                              | Manual (negative, neutral, positive)                   |
| [60] | YouTube        | HPV                      | Global, not specified | N/A                     | Manual                                              | Manual (discouraging, encouraging, neutral)            |
| [61] | YouTube        | Any                      | Global, not specified | 04/09/2007 – 17/10/2015 | Manual                                              | Manual (discouraging, encouraging, neutral)            |
| [62] | YouTube        | HPV                      | United States         | 01/11/2010              | Manual                                              | Manual (ambiguous, negative, neutral, other, positive) |
| [63] | YouTube        | Any                      | Global, not specified | 15/05-20/05             | Manual                                              | Manual (against vaccination, for vaccination)          |
| [64] | YouTube        | Any (childhood vaccines) | Italy                 | 06/2014 – 09/2015       | Manual                                              | Manual (ambiguous, negative, neutral, positive)        |
| [65] | YouTube        | Any (childhood vaccines) | Italy                 | 27/12/2007 – 31/072017  | Manual                                              | Manual (negative, neutral, positive)                   |

|      |         |                 |                       |                               |        |                                                 |
|------|---------|-----------------|-----------------------|-------------------------------|--------|-------------------------------------------------|
| [66] | YouTube | HPV             | Global, not specified | 13/11/2006<br>–<br>14/04/2014 | Manual | Manual (negative, neutral, positive)            |
| [67] | YouTube | Meningococcal B | Global, not specified | 19/02/2018<br>–<br>21/02/2018 | Manual | Manual (ambiguous, negative, neutral, positive) |
| [68] | YouTube | Any             | Global, not specified | 20/02/2007                    | Manual | Manual (ambiguous, negative, positive)          |
| [69] | YouTube | HPV             | Global, not specified | 26/07/2013                    | Manual | Manual (negative, positive)                     |
| [70] | YouTube | Any             | Global, not specified | 20/11/2013 -<br>27/11/2013    | Manual | Manual (anti-vaccine, pro-vaccine)              |

---

<sup>a</sup> API: Application programme interface

<sup>b</sup> HPV: Human papillomavirus

<sup>c</sup> LDA: Latent dirichlet allocation

<sup>d</sup> DTP-HepB-Hib: diphtheria, tetanus, pertussis, hepatitis B, and haemophilus influenzae type B
